# Supplementary material for: Accelerated epigenetic aging in women with emotionally unstable personality disorder and a history of suicide attempts
Source: PubMed Central journal article supplement (PMC9946998; doi:10.1038/s41398-023-02369-7), 2023-02-22

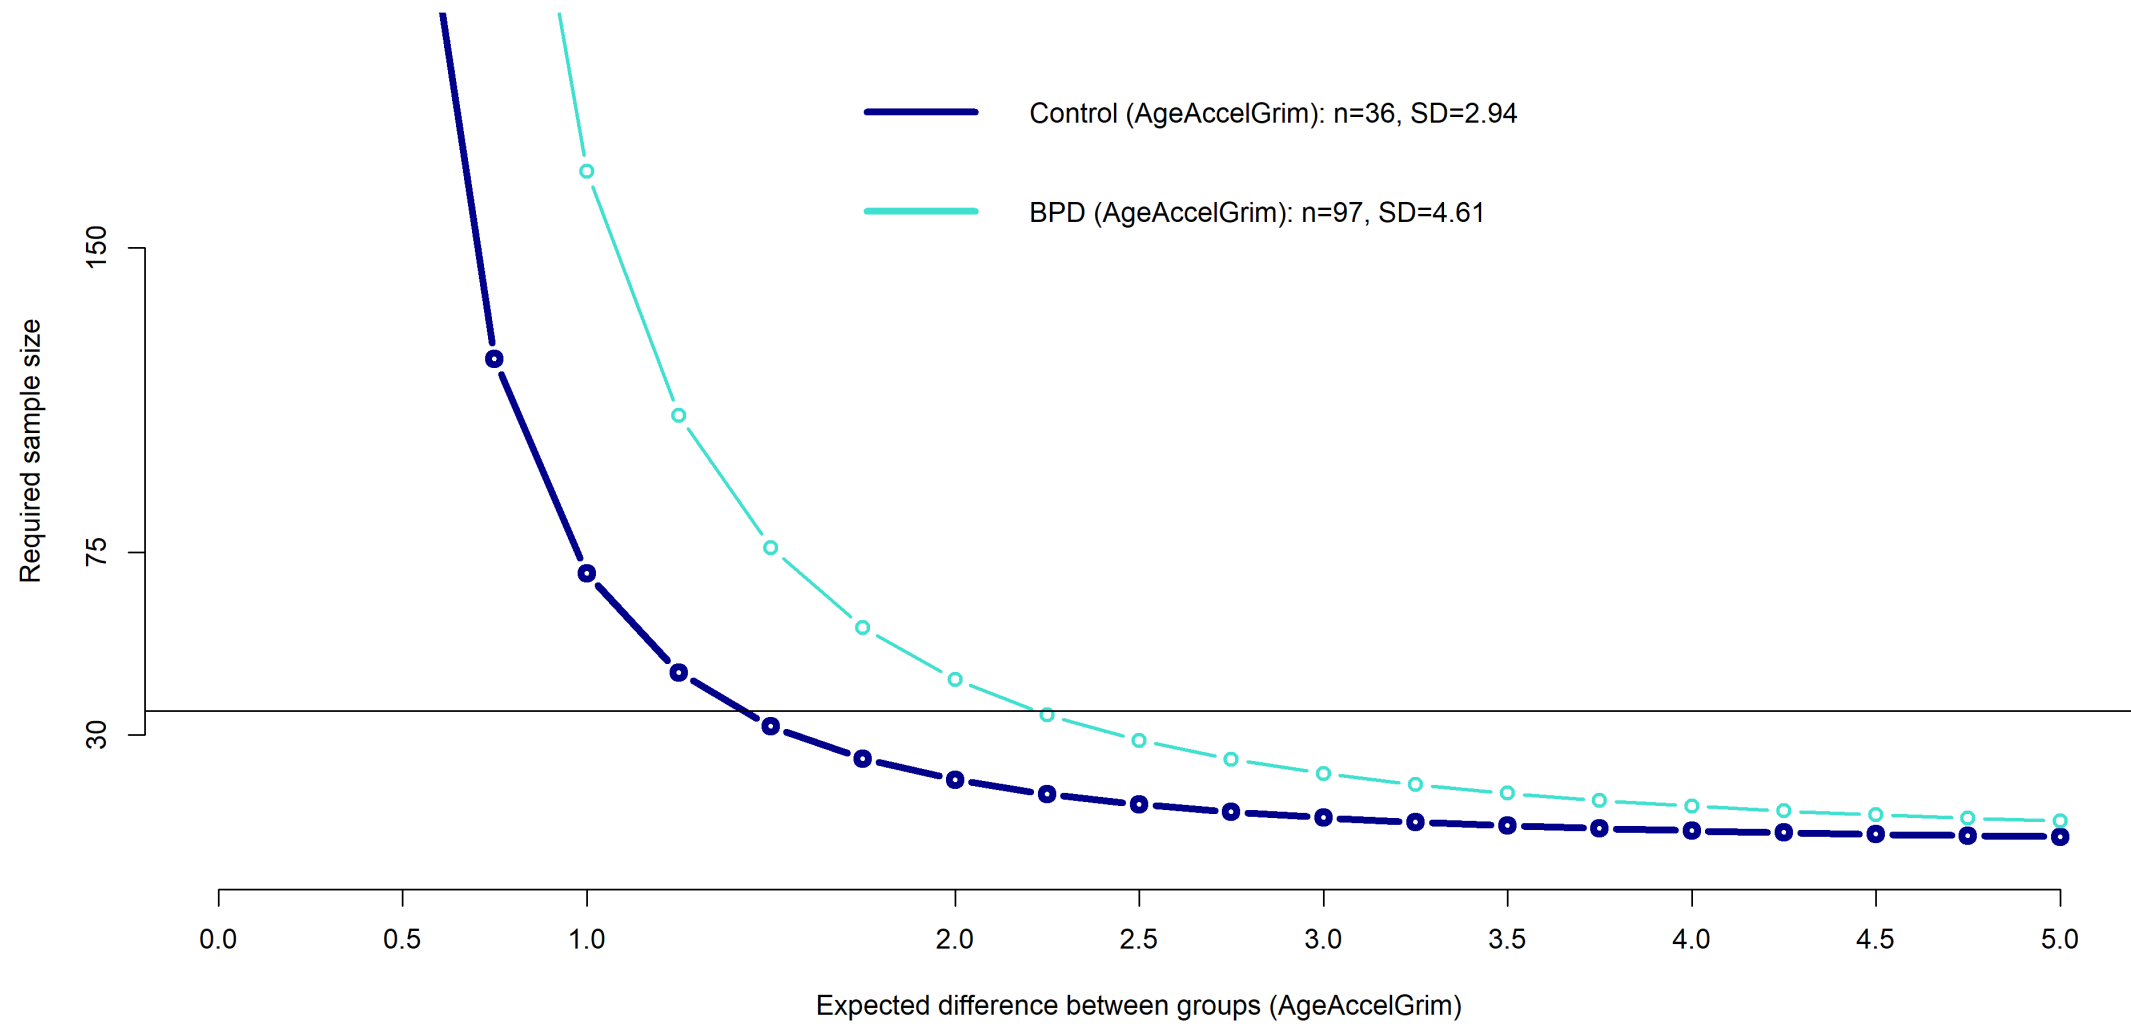

Supplement: 41398_2023_2369_MOESM3_ESM.pdf [file 41398_2023_2369_MOESM3_ESM.pdf]
